# Supplementary material for: Assessing the Phytochemical Profile and Potential of Traditional Herbal Infusions against Aldose Reductase through In Silico Studies and LC-MS/MS Analysis
Source: MDPI journal article supplement (doi:10.3390/app12168361), 2022-08-21
Supplement: s1 [file s1]

|                    |   |   |   |   |   |   |   |   |   |   |                                                                    |
|--------------------|---|---|---|---|---|---|---|---|---|---|--------------------------------------------------------------------|
| Quinic acid        | - | √ | - | - | - | - | - | - | - | √ | [1,3]                                                              |
| Resveratrol        | - | - | - | - | - | - | - | - | - | √ | ( <a href="https://foodb.ca/">https://foodb.ca/</a> )              |
| Rosmarinic acid    | √ | √ | √ | √ | √ | - | - | - | - | - | [1,2,4,8]                                                          |
| Sagerinic acid     | - | - | - | - | √ | - | - | - | - | - | [2]                                                                |
| Sakuranetin        | √ | - | - | - | - | - | - | - | - | - | [4]                                                                |
| Salicylic acid     | - | - | - | - | - | - | √ | - | √ | - | [6,9]                                                              |
| Salvianolic acid A | - | - | - | - | √ | - | - | - | - | - | [2]                                                                |
| Salvianolic acid B | - | - | - | √ | √ | - | - | - | - | - | [2,4]                                                              |
| Salvianolic acid F | - | - | - | - | √ | - | - | - | - | - | [2]                                                                |
| Salvianolic acid I | √ | - | - | - | - | - | - | - | - | - | [4]                                                                |
| Salvianolic acid J | - | - | - | - | √ | - | - | - | - | - | [2]                                                                |
| Syringetin         | - | - | - | √ | - | - | - | - | - | - | [4]                                                                |
| Syringic acid      | √ | √ | √ | √ | - | - | - | - | - | - | ( <a href="https://foodb.ca/">https://foodb.ca/</a> )<br>[4,8]     |
| Taxifolin          | √ | √ | - | - | - | - | - | - | - | - | [1,4]                                                              |
| Thymol             | - | - | √ | - | - | - | - | - | - | - | [8]                                                                |
| Vanillic acid      | √ | √ | √ | √ | √ | - | - | - | - | √ | ( <a href="https://foodb.ca/">https://foodb.ca/</a> )<br>[4,5,8,9] |
| Vanillyl alcohol   | - | - | - | √ | - | - | - | - | - | - | [4]                                                                |
| Vitexin            | √ | - | - | - | - | - | - | - | - | - | [4]                                                                |

<sup>1</sup>*O. majorana*: *Origanum majorana*, *O. vulgare*: *Origanum vulgare*, *T. capitatus*: *Thymus capitatus*, *M. pulegium*: *Mentha pulegium*, *M. spicata*: *Mentha spicata*, *E. purpurea*: *Echinacea purpurea*, *M. chamomilla*: *Matricaria chamomilla*, *L. citriodora*: *Lippia citriodora*, *H. rhamnoides*: *Hippophae rhamnoides*, *H. perforatum*: *Hypericum perforatum*,

<sup>2</sup>The symbol declares the absence of the phenolic compound from the herbal infusion, <sup>3</sup> The symbol declares the presence of phenolic compound in the herbal infusion

**Table S2.** Molecular target prediction results derived from all collected phenolic compounds, by applying Ensemble TargetNet ([http://targetnet.scbdd.com/calcnnet/index\\_ensemble/](http://targetnet.scbdd.com/calcnnet/index_ensemble/)) calculations [12].

| <b>Fingerprint Types (Daylight fingerprint and ECFP4)</b> |                                     |
|-----------------------------------------------------------|-------------------------------------|
| <b>Compounds</b>                                          | <b>AUC value - aldose reductase</b> |
| 3,4-Dihydroxyphenyllactic acid (Danshensu)                | 1.0                                 |
| 31-Caffeoylquinic (Neochlorogenic acid)                   | 1.0                                 |
| 3-Feruloylquinic acid                                     | 0.667                               |
| 3-O-methyl-catechin (Meciadanol)                          | 1.0                                 |
| 3-p-Coumaroylquinic acid                                  | 0.67                                |
| 4-Hydroxybenzoic acid                                     | 1.0                                 |
| 5-O-Caffeoylquinic acid                                   | 0.667                               |
| 6-Methylscutellarein                                      | 1.0                                 |
| Acacetin rutinoside                                       | 0.665                               |
| Acacetin-7-diglucuronide                                  | 1.0                                 |
| Apigenin                                                  | 0.667                               |
| Apigenin-7-o-glucoside                                    | 1.0                                 |
| Caffeic acid                                              | 1.0                                 |
| Caffeoyl-arbutin                                          | 1.0                                 |
| Caftaric acid                                             | 1.0                                 |
| Carnosic acid                                             | 1.0                                 |
| Carnosol                                                  | 0.316                               |
| Catechin                                                  | 1.0                                 |
| Chlorogenic acid                                          | 0.667                               |
| Chrysoeriol                                               | 1.0                                 |
| Chrysoeriol-7-diglucuronide                               | 1.0                                 |
| Cichoric acid                                             | 1.0                                 |
| Cinapic acid                                              | 0.667                               |
| Cinnamic acid                                             | 1.0                                 |
| Cirsilineol                                               | 1.0                                 |
| Cirsimaritin                                              | 1.0                                 |
| Diosmetin                                                 | 0.667                               |
| Diosmin                                                   | 1.0                                 |
| Ellagic acid                                              | 1.0                                 |
| Ellagic acid pentoside                                    | 1.0                                 |
| Epicatechin                                               | 1.0                                 |
| Eriodictyol                                               | 1.0                                 |
| Eriodictyol-7-o-glucuronide                               | 1.0                                 |
| Eukovoside                                                | 0.563                               |
| Eupafolin                                                 | 1.0                                 |
| Eupatorin                                                 | 1.0                                 |
| Ferullic acid                                             | 1.0                                 |
| Feruloylquinic acid                                       | 0.667                               |

|                                            |       |
|--------------------------------------------|-------|
| Gallic acid                                | 1.0   |
| Gallocatechin                              | 0.667 |
| Gentisic acid                              | 1.0   |
| Guaijaverin<br>(quercetin 3-O-arabinoside) | 1.0   |
| Hesperidin                                 | 0.628 |
| Hydroxyphenyllactic acid                   | 0.695 |
| Hyperoside<br>(quercetin 3-O-galactoside)  | 1.0   |
| Isoorientin                                | 1.0   |
| Isoquercitrin                              | 1.0   |
| Isoquerutrin                               | 1.0   |
| Isorhamnetin                               | 1.0   |
| Isosalvianolic acid B                      | 0.667 |
| Jaceosidin                                 | 1.0   |
| Kaempferol                                 | 1.0   |
| Kaempferol 3-O-rutinoside                  | 1.0   |
| Laricitrin-3-o-glucoside                   | 1.0   |
| Lithospermic acid                          | 0.605 |
| Luteolin                                   | 1.0   |
| Luteolin 7-O-glucoside                     | 1.0   |
| Medioresinol                               | 1.0   |
| Myricetin 3-O-glucoside                    | 1.0   |
| Naringenin                                 | 0.329 |
| Narirutin                                  | 1.0   |
| Orientin                                   | 1.0   |
| p-Coumaric acid                            | 1.0   |
| Protocatechuic acid                        | 1.0   |
| Quercetin                                  | 1.0   |
| Quercetin rutinoside / Rutin               | 1.0   |
| Quercetin-3-O-glucoside                    | 0.996 |
| Quercitrin                                 | 1.0   |
| Quinic acid                                | 1.0   |
| Resveratrol                                | 0.695 |
| Rosmarinic acid                            | 0.662 |
| Sagerinic acid                             | 1.0   |
| Sakuranetin                                | 0.667 |
| Salicylic acid                             | 1.0   |
| Salvianolic acid A                         | 0.605 |
| Salvianolic acid B                         | 0.667 |
| Salvianolic acid F                         | 0.670 |
| Salvianolic acid I                         | 0.667 |
| Salvianolic acid J                         | 0.667 |
| Syringetin                                 | 1.0   |
| Syringic acid                              | 1.0   |
| Taxifolin                                  | 0.481 |
| Thymol                                     | 1.0   |
| Vanillic acid                              | 0.695 |
| Vanillyl alcohol                           | 0.659 |

|         |     |
|---------|-----|
| Vitexin | 1.0 |
|---------|-----|



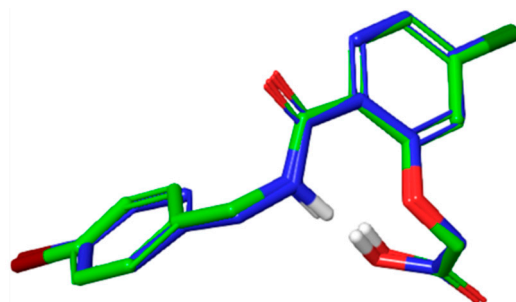

**Aldose Reductase (Chain A)**  
 PDB ID: 4LAU, Resolution: 0.84 Å  
 (2-[(4-bromobenzyl)carbamoyl]-5-chlorophenoxy)acetic acid - W8X  
 Docking score = -11.61 kcal·mol<sup>-1</sup>  
 RMSD = 0.1894 Å

**Figure S1.** The similarity in the overlapping between crystallographic (blue) and docked (green) poses, derived from aldose reductase (AR) enzyme.

## References

1. Milevskaya, V.V.; Prasad, S.; Temerdashev, Z.A. Extraction and Chromatographic Determination of Phenolic Compounds from Medicinal Herbs in the Lamiaceae and Hypericaceae Families: A Review. *Microchemical Journal* **2019**, *145*, 1036–1049, doi:10.1016/j.microc.2018.11.041.
2. Cirlini, M.; Mena, P.; Tassotti, M.; Herrlinger, K.A.; Nieman, K.M.; Dall'Asta, C.; Del Rio, D. Phenolic and Volatile Composition of a Dry Spearmint (*Mentha Spicata* L.) Extract. *Molecules* **2016**, *21*, E1007, doi:10.3390/molecules21081007.
3. Tusevski, O.; Krstikj, M.; Stanoeva, J.P.; Stefova, M.; Gadzovska Simic, S. Phenolic Profile and Biological Activity of *Hypericum Perforatum* L.: Can Roots Be Considered as a New Source of Natural Compounds? *South African Journal of Botany* **2018**, *117*, 301–310, doi:10.1016/j.sajb.2018.05.030.
4. Taamalli, A.; Arráez-Román, D.; Abaza, L.; Iswaldi, I.; Fernández-Gutiérrez, A.; Zarrouk, M.; Segura-Carretero, A. LC-MS-Based Metabolite Profiling of Methanolic Extracts from the Medicinal and Aromatic Species *Mentha Pulegium* and *Origanum Majorana*. *Phytochem Anal* **2015**, *26*, 320–330, doi:10.1002/pca.2566.
5. Skendi, A.; Irakli, M.; Chatzopoulou, P. Analysis of Phenolic Compounds in Greek Plants of Lamiaceae Family by HPLC. *Journal of Applied Research on Medicinal and Aromatic Plants* **2017**, *6*, 62–69, doi:10.1016/j.jarmap.2017.02.001.
6. Haghi, G.; Hatami, A.; Safaei, A.; Mehran, M. Analysis of Phenolic Compounds in *Matricaria Chamomilla* and Its Extracts by UPLC-UV. *Res Pharm Sci* **2014**, *9*, 31–37.
7. Ivanović, M.; Alañón, M.E.; Arráez-Román, D.; Segura-Carretero, A. Enhanced and Green Extraction of Bioactive Compounds from *Lippia Citriodora* by Tailor-Made Natural Deep Eutectic Solvents. *Food Research International* **2018**, *111*, 67–76, doi:10.1016/j.foodres.2018.05.014.
8. Jabri-Karoui, I.; Bettaieb, I.; Msaada, K.; Hammami, M.; Marzouk, B. Research on the Phenolic Compounds and Antioxidant Activities of Tunisian *Thymus Capitatus*. *Journal of Functional Foods* **2012**, *4*, 661–669, doi:10.1016/j.jff.2012.04.007.
9. Zadernowski, R.; Naczka, M.; Czaplicki, S.; Rubinskiene, M.; Szałkiewicz, M. Composition of Phenolic Acids in Sea Buckthorn (*Hippophae Rhamnoides* L.) Berries. **2005**, doi:10.1007/S11746-005-5169-1.
10. Coelho, J.; Barros, L.; Dias, M.I.; Finimundy, T.C.; Amaral, J.S.; Alves, M.J.; Calhelha, R.C.; Santos, P.F.; Ferreira, I.C.F.R. *Echinacea Purpurea* (L.) Moench: Chemical Characterization and Bioactivity of Its Extracts and Fractions. *Pharmaceuticals* **2020**, *13*, 125, doi:10.3390/ph13060125.
11. Villegas-Aguilar, M. del C.; Leyva-Jiménez, F.J.; Cádiz-Gurrea, M. de la L.; Segura-Carretero, A.; Arráez-Román, D. Comprehensive Analysis of Antioxidant Compounds from *Lippia Citriodora*

and Hibiscus Sabdariffa Green Extracts Attained by Response Surface Methodology. *Antioxidants* **2020**, *9*, 1175, doi:10.3390/antiox9121175.

12. Yao, Z.-J.; Dong, J.; Che, Y.-J.; Zhu, M.-F.; Wen, M.; Wang, N.-N.; Wang, S.; Lu, A.-P.; Cao, D.-S. TargetNet: A Web Service for Predicting Potential Drug-Target Interaction Profiling via Multi-Target SAR Models. *J Comput Aided Mol Des* **2016**, *30*, 413–424, doi:10.1007/s10822-016-9915-2.
